# 1 **Site-Specific Labelling of Multidomain Proteins by Amber** 2 **Codon Suppression**

3

4 Christina S. Heil<sup>+</sup>, Alexander Rittner<sup>+</sup>, Bjarne Goebel, Daniel Beyer and  
5 Martin Grininger\*

6

## 7 **Author affiliation**

8 Institute of Organic Chemistry and Chemical Biology, Buchmann Institute for  
9 Molecular Life Sciences, Cluster of Excellence for Macromolecular Complexes,  
10 Goethe University Frankfurt, Max-von-Laue-Str. 15, 60438 Frankfurt am Main,  
11 Germany.

12

## 13 **Correspondence**

14 \*grininger@chemie.uni-frankfurt.de

15 <sup>+</sup>these authors contributed equally to this work

16

## 17 **Abstract**

18 Amber codon suppression is a powerful tool to site-specifically modify proteins to  
19 generate novel biophysical probes. Yet, its application on large and complex  
20 multidomain proteins is challenging, leading to difficulties during structural and  
21 conformational characterization using spectroscopic methods. The animal fatty acid  
22 synthase type I is a 540 kDa homodimer displaying large conformational variability.  
23 As the key enzyme of *de novo* fatty acid synthesis, it attracts interest in the fields of  
24 obesity, diabetes and cancer treatment. Substrates and intermediates remain  
25 covalently bound to the enzyme during biosynthesis and are shuttled to all catalytic  
26 domains by the acyl carrier protein domain. Thus, conformational variability of animal  
27 FAS is an essential aspect for fatty acid biosynthesis. We investigate this  
28 multidomain protein as a model system for probing amber codon suppression by  
29 genetic encoding of non-canonical amino acids. The systematic approach relies on a  
30 microplate-based reporter assay of low complexity, that was used for quick screening  
31 of suppression conditions. Furthermore, the applicability of the reporter assay is  
32 demonstrated by successful upscaling to both full-length constructs and increased  
33 expression scale. The obtained fluorescent probes of murine FAS type I could be  
34 subjected readily to a conformational analysis using single-molecule fluorescence  
35 resonance energy transfer.

## 36 Introduction

37 Fatty acid synthases type I (FASs) are large and complex multidomain enzymes that  
38 are responsible for cytosolic *de novo* fatty acid synthesis<sup>1,2</sup>. Evolutionarily related to  
39 FAS are polyketide synthases type I (PKSs), that synthesize polyketides, which  
40 account for one of the largest classes of natural products<sup>3,4</sup>. In FASs and PKSs,  
41 multiple catalytic sites interact successively to stepwise assemble fatty acids or the  
42 complex and chemically diverse polyketides (Fig. 1A)<sup>5</sup>. A common feature of these  
43 enzymes is, that the substrates remain covalently bound to the acyl carrier protein  
44 (ACP) domain during catalysis. The ACP domain interacts with all catalytic domains,  
45 which requires large positional variability within the FAS and PKS systems<sup>6-9</sup>.

46 While the overall architecture of type I PKSs has not yet been firmly elucidated<sup>10,11</sup>,  
47 high resolution data of FASs in different structural arrangements are available<sup>6,12</sup>. As  
48 observed in 3.2 Å model X-ray crystal structure on FAS from pig, animal FAS  
49 assembles into an intertwined dimer of approximately 540 kDa, adopting an “X”-  
50 shaped conformation (Fig. 1B). Although the ACP and TE domains could not be  
51 traced in the electron density, it becomes apparent from the model, that a positionally  
52 variable ACP alone is not able to reach every catalytic centre. This paradox was  
53 already described by Hammes *et al.* in an early fluorescence resonance energy  
54 transfer (FRET) study on chicken liver FAS<sup>13,14</sup>. More detailed insights into the  
55 conformational versatility of animal FAS were finally given by a recent negative stain  
56 electron microscopy (EM) study on rat FAS, high-speed atomic force microscopy on  
57 insect FAS and by computational modelling with porcine FAS data<sup>7,8,15</sup>. These  
58 studies revealed large conformational changes within the enzyme, with complete  
59 relative rotational and swinging freedom between the condensing and processing  
60 wing (Fig. 1C).

61 To study the conformational dynamics of animal FAS and related PKSs in real-time,  
62 we seek to establish spectroscopic methods at the single-molecule level, as they can  
63 deliver a continuous spectrum of stochastic conformational motions in proteins<sup>16,17</sup>.  
64 An integral aspect of spectroscopic methods is the modification of proteins with  
65 labels. Conventional techniques, such as labelling naturally occurring or mutationally  
66 introduced cysteines via maleimide chemistry<sup>18</sup>, are not applicable for animal FAS,  
67 since the large complex features many native cysteines, including active site  
68 cysteines. Our method of choice was therefore the genetic encoding of non-  
69 canonical amino acids (ncAAs) through the amber codon suppression

70 technology<sup>19,20</sup>. Such ncAAs carry orthogonal functional groups, which can be used  
71 to site-specifically attach spectroscopic labels by post-translational modification.

72 To the best of our knowledge, the introduction of ncAAs and the subsequent  
73 bioconjugation with a fluorophore have neither been reported for megasynthases nor  
74 for any other multidomain protein of such sizes to date. We therefore established a  
75 systematic approach, in which the screening of amber codon suppression systems,  
76 ncAA insertion sites and fluorophore click protocols can be performed with an  
77 authentic system of low complexity, that promises a high success rate in upscaling  
78 for the production of the full-length protein. Specifically, we set up a microplate-based  
79 reporter assay and upscaling protocols, which achieved the production of ncAA-  
80 modified murine FAS (mFAS), further successfully labelled with fluorophores. The  
81 reporter assay, performed on an ACP-GFP fusion protein, is a suited platform for the  
82 screening of ncAA incorporation by the read-out of the fluorescence of the fused  
83 GFP domain<sup>21</sup>. Successful upscaling demonstrates the reliability and applicability of  
84 reporter assay data to larger protein constructs in increased expression scale.

85

## 86 RESULTS

### 87 Screening of the amber codon suppression toolbox

88 Out of a growing repertoire of ncAAs, that are introduced by amber codon  
89 suppression, we limited our screening to eight different ncAAs with functional groups,  
90 that can be used for bioconjugation with click chemistry or oxime formation (Fig. 2A;  
91 for syntheses of respective ncAAs, see Supplementary Methods)<sup>19</sup>. Azido- and  
92 propargyl-functional groups can for example be used in copper(I)-catalysed alkyne-  
93 azide cycloadditions (CuAACs)<sup>22</sup>. Since copper is critical for the stability of the  
94 protein, we focused on copper-free click chemistry, like the strain-promoted alkyne-  
95 azide cycloaddition (SPAAC)<sup>23</sup>, with azido- and bicyclononyne (BCN)-functional  
96 groups, and the inverse electron-demand Diels-Alder cycloaddition (IEDDAC)<sup>24</sup>, with  
97 tetrazine- and norbornene-functional groups. Additionally, we also tested  
98 incorporation of the ncAA AcLys, as the acyl-functional group can be bioconjugated  
99 in oxime formation<sup>25</sup>, and acetylation of lysines naturally occurs as post-translational  
100 modification in animal FAS<sup>26</sup>.

101 Further, we compared two common suppressor vectors pUltra and pEVOL (see  
102 Supplementary Fig. S1), published by Schultz and coworkers<sup>27,28</sup>, and several  
103 evolved aminoacyl-tRNA synthetase (aaRS)/tRNA pairs from *Methanococcus*  
104 *jannaschii*, *Methanosarcina mazei* and *Methanosarcina barkeri* for their performance.  
105 The cloning procedure of suppressor vectors pAC<sup>U</sup> and pAC<sup>E</sup> (based on original  
106 pUltra and pEVOL, respectively) is described in detail in the Supplementary  
107 Methods. Supplementary Table S1 lists all primers used for cloning, and  
108 Supplementary Table S2 summarizes all suppressor plasmids and evolved aaRS of  
109 this study.

110 To identify the optimal pair of suppression system and ncAA, we established a  
111 reporter assay. The screening was performed on a fusion construct of ACP from  
112 mFAS with GFP (ACP-GFP), placing the amber mutation in a disordered and non-  
113 conserved loop region at the Leu54 site, using the homologous rat ACP structure  
114 (PDB: 2png) as template. Incorporation efficiency was read out at 2 mL scale by  
115 recording the fluorescence of *E. coli* cell cultures expressing different ACP-GFP  
116 mutants. Cultures lacking the ncAA in the medium were taken as negative controls to  
117 determine the background signal (Fig. 2B). Negative samples showed a fluorescence  
118 level of up to 4% of the wild type reference. High incorporation efficiencies were  
119 observed for AzPhe<sup>29</sup> (35% ± 8%) and NorLys2<sup>30,31</sup> (26% ± 9%). The ncAA BCNLys<sup>32</sup>

120 was incorporated with  $12\% \pm 2\%$  efficiency, all other ncAAs (PrPhe<sup>33</sup>, TetPhe<sup>34</sup>,  
121 NorLys1<sup>24</sup> and PrLys<sup>35</sup>) showed efficiencies below 10%, and AcLys<sup>36</sup> was hardly  
122 incorporated at all. Comparing the suppressor plasmids pAC<sup>E</sup> and pAC<sup>U</sup>, the plasmid  
123 pAC<sup>E</sup> seemed to be slightly more efficient in our set-up than its pAC<sup>U</sup> counterpart  
124 ( $30\% \pm 6\%$  pAC<sup>E</sup>\_AzPhe<sup>D286R</sup> vs.  $23\% \pm 5\%$  pAC<sup>U</sup>\_AzPhe<sup>D286R</sup> and  $26\% \pm 9\%$   
125 pAC<sup>E</sup>\_NorLys vs.  $18\% \pm 5\%$  pAC<sup>U</sup>\_NorLys). The D286R mutation in the aminoacyl-  
126 tRNA synthetase of *M. jannaschii*<sup>37</sup>, which was reported to have a beneficial effect,  
127 did not improve incorporation efficiencies in our hands ( $23\% \pm 5\%$  pAC<sup>U</sup>\_AzPhe<sup>D286R</sup>  
128 vs.  $35\% \pm 8\%$  pAC<sup>U</sup>\_AzPhe). Comparing the two orthogonal systems, the tyrosyl-  
129 tRNA synthetase derived from *M. jannaschii* (mjTyrRS) seemed to be more efficient  
130 in our set-up than the pyrrolysyl-tRNA synthetases of *M. mazei* or *M. barkeri*  
131 (mmPylRS or mbPylRS, respectively) (e.g.  $35\% \pm 8\%$  pAC<sup>U</sup>\_AzPhe (mj) vs.  
132  $18\% \pm 5\%$  pAC<sup>U</sup>\_NorLys (mm)). We also tested two less specific suppressor vectors,  
133 which incorporate multiple ncAAs. While the suppressor plasmid pAC<sup>U</sup>\_Phe-  
134 derivatives of *M. mazei*<sup>38</sup> failed to incorporate any phenylalanine derivatives, the  
135 suppressor plasmid pAC<sup>U</sup>\_CNF from *M. jannaschii*<sup>39,40</sup> showed high incorporation  
136 efficiencies of  $40\% \pm 11\%$ , but suffered from relatively high fluorescence of the  
137 negative control ( $18\% \pm 7\%$ ), indicating unspecific incorporation of endogenous  
138 amino acids. A compilation of all results from the reporter assay screening can be  
139 found in Supplementary Fig. S2.

## 140 Screening of ncAA incorporation sites

141 As it has been reported before that the specific position of an amber mutation has  
142 major effects on incorporation efficiencies<sup>41</sup>, we used the most promising systems  
143 from the initial screening to compare incorporation efficiencies at different sites  
144 (pAC<sup>U</sup>\_AzPhe with AzPhe as the optimal result and the respective vector  
145 pAC<sup>U</sup>\_NorLys for NorLys2). Hence, we selected six positions in the ACP fold to test  
146 the acceptance of ncAA incorporation (Ala in the linker region between the N-  
147 terminal Strep-tag and ACP-GFP, Gly01 at the N-terminus of the mouse ACP  
148 sequence, Leu54 in a disordered loop region, Gln70 and Asp71 in helix 5 and Ala79  
149 in the linker between ACP and GFP; see Fig. 3A and 3B). AzPhe was incorporated  
150 with good efficiencies (in average  $38\% \pm 1\%$ ) throughout all amber mutation sites,  
151 whereas the incorporation efficiencies for NorLys2 were strongly dependent on the  
152 respective position (Fig. 3C). Best incorporation efficiency for NorLys2 was gained  
153 for the amber mutation site Gly01 at the N-terminus with  $39\% \pm 13\%$ . The amber

154 mutation site Leu54 in the disordered loop region of ACP showed  $16\% \pm 6\%$   
155 incorporation efficiency for NorLys2, whereas amber mutation site Gln70 in the last  
156 helix of ACP showed no incorporation at all. All other amber mutation sites showed  
157 incorporation efficiencies below 10%. Higher concentrations (4 mM and 8 mM) of  
158 ncAAs in the medium seemed to slightly increase incorporation efficiency of NorLys2  
159 and slightly decrease efficiency of AzPhe (see Supplementary Fig. S3). Therefore,  
160 we proceeded with a concentration of 2 mM ncAA.

## 161 Upscaling of protein production

162 In a next step, it was tested whether the selected conditions from the reporter assay  
163 could be reproduced in larger expression cultures of 200 mL. Each culture was  
164 analysed in fluorescence, as was implemented in the reporter assay, and further  
165 evaluated by the yield of purified protein. Fluorescence data was collected similarly  
166 to the reporter assay, taking a 2 mL sample of the cell culture. The ncAA AzPhe was  
167 incorporated with overall good efficiency (in average  $32\% \pm 4\%$ ), whereas large  
168 variations were observed for incorporation of NorLys2 at different amber mutation  
169 sites (Fig. 4A). Best incorporation efficiency for NorLys2 was gained for the amber  
170 mutation site Leu54 with  $29\% \pm 3\%$  and no incorporation was achieved at amber  
171 mutation site Gln70. This data agreed well with the results from the reporter assay,  
172 except for the incorporation of NorLys2 in Gly01 failing at larger volume, while  
173 leading to best incorporation efficiencies in the reporter assay. We observed  
174 systematic higher values for NorLys2 and slightly lower values for AzPhe by GFP-  
175 fluorescence in the larger expression culture as compared to the reporter assay.

176 For comparing protein yields, cells received from 200 mL expression cultures were  
177 lysed and proteins were isolated by Ni-chelating chromatography. Compared to ACP-  
178 GFP at  $53 \pm 15$  mg, the positive mutants were expressed in average with  $14 \pm 3$  mg  
179 yield, which corresponds to about 25% of the wild type protein yield (Fig. 4B). The  
180 incorporation efficiency quantified by protein yield correlated well with the trends of  
181 the fluorescence data. AzPhe was again incorporated with overall good efficiency (in  
182 average  $33\% \pm 4\%$ ), whereas NorLys2 performed differently throughout the amber  
183 mutation sites (Fig. 4A). The optimal site for NorLys2, Leu54 in the disordered loop  
184 region, showed  $42\% \pm 12\%$  incorporation efficiency, and even the amber mutation  
185 sites Glu71 and Ala79 gave up to 30% incorporation efficiency. Again, no  
186 incorporation of NorLys2 at the amber mutation site Gln70 was monitored. We note  
187 that NorLys2 mutants led to higher protein yields than expected from fluorescence

188 intensities of cell cultures, which cannot be explained with the collected data. The  
189 quality of proteins was analysed by size exclusion chromatography (SEC) and mass  
190 spectrometry (MS). The elution profiles of the different ACP-GFP mutants matched  
191 very well with the wild type SEC spectrum (Fig. 4C). The incorporation of the ncAAs  
192 was confirmed by MS analysis (see Supplementary Data).

## 193 Fluorescent labelling of ACP-GFP

194 In first experiments, we screened click kinetics for our target protein ACP-GFP (see  
195 Supplementary Fig. S4) and received a suited condition of 2 h of incubation at room  
196 temperature with 80 equiv. of fluorophore in 10  $\mu$ L reaction volume for both the  
197 SPAAC (AzPhe mutant BCN-POE<sub>3</sub>-NH-DY649P1 conjugate) and the IEDDAC  
198 (NorLys2 mutant 6-methyl-tetrazine-ATTO-647N conjugate). For determining the  
199 degree of labelling (DOL) by in-gel fluorescence, ACP-GFP enzymatically modified  
200 by a fluorescent CoA-label by a 4'-phosphopantetheinyl transferase (Sfp)<sup>42</sup> was used  
201 as reference. For better comparison, the different fluorescence intensities were  
202 corrected by the respective quantum efficiencies. Three different fluorophores were  
203 used in this experiment: DY647P1 at the CoA-label (quantum efficiency 30%  
204 according to the manufacturer), DY649P1 at the BCN-label (quantum efficiency 30%  
205 according to the manufacturer) and ATTO 647N at the tetrazine-label (quantum  
206 efficiency 65% according to the manufacturer). The sample of ACP-GFP  
207 enzymatically modified by a fluorescent CoA-label showed highest fluorescence and  
208 was assumed to be quantitatively labeled<sup>43</sup>, and thus set to 100% as the wild type  
209 reference. All fluorescence intensities were further correlated to the intensity of the  
210 protein bands of the Coomassie-stained gel. In average, the AzPhe mutants clicked  
211 more efficiently than the NorLys2 mutants (74% over 23%) (Fig. 5A).

212 The DOL was alternatively determined by spectroscopy with samples Gly01AzPhe  
213 and Leu54NorLys2, after removal of excess free fluorophore by purification over Ni-  
214 NTA magnetic beads. In a single experiment, these proteins were clicked with  
215 25 equiv. of fluorophore in 50  $\mu$ L reaction volume and the labelling efficiency was  
216 monitored with UV-Vis absorbance spectra. For the wild type reference, a DOL of  
217 75% was determined, whereas the Gly01AzPhe mutant showed 63% DOL and the  
218 Leu54NorLys2 mutant showed only 37% DOL (Fig. 5B). We explain the difference in  
219 DOL as originating from different reaction conditions and sample preparations  
220 performed for analysis in SDS-PAGE and spectroscopy (see Fig. 5A and B). The  
221 quantum efficiency is determined for the free fluorophore and may be differently  
222 affected by the microenvironment within the native and the denatured protein. Data



223 may also indicate that ACP was not quantitatively labelled during enzymatic  
224 modification with fluorescent CoA-label. As in-gel fluorescence is always determined  
225 relative to the wild type reference, accurate comparison of intensities between  
226 different gels is difficult, and thus we observed variations in the DOL in further  
227 labelling reactions. We note that the DOL was determined in single experiments by  
228 two different methods, without the claim for statistical representation.

## 229 Application of selected conditions on full-length mFAS

230 Three amber mutations were introduced in the ACP domain of full-length mFAS. Two  
231 of those mutations were selected as promising candidate constructs at positions  
232 Gly2113 (Gly01 in ACP) and Leu2166 (Leu54 in ACP), and the other mutation as a  
233 negative candidate construct at position Gln2182 (Gln70 in ACP). The incorporation  
234 of ncAAs to yield the proteins Gly2113AzPhe, Leu2166NorLys2 and  
235 Gln2182NorLys2 was performed with the conditions identified by screening and  
236 upscaling experiments, as described above. In agreement with data of the reporter  
237 assay and ACP-GFP protein analysis, the mutants Gly2113AzPhe and  
238 Leu2166NorK2 were expressed in good yields (1.9 mg/L culture and 0.9 mg/L  
239 culture, respectively), whereas the Gln2182NorK2 mutant expressed poorly  
240 (0.03 mg/L culture, in comparison to the wild type mFAS: 2.9 mg/L culture) (see  
241 Supplementary Fig. S5). Western blot analysis with antibodies against the N-terminal  
242 Strep-tag and C-terminal His-tag was used for reading out incorporation efficiency.  
243 Double bands are observed for the mutants Gly2113AzPhe and Leu2166NorK2. This  
244 indicates mixtures of mFAS in full-length (upper red & green band) and truncated  
245 protein (lower red band) (both bands at about 260 kDa size), indicating probably  
246 insufficient suppression of the amber codon (Fig. 6A). Western Blot analysis of the  
247 negative candidate Gln2182NorK2 mutant shows only the lower molecular weight  
248 band corresponding to truncated band, and indicates the failed incorporation of the  
249 ncAA. The purified constructs of mFAS were further clicked with fluorophores, which  
250 confirmed successful incorporation of the ncAAs. In addition to specific labelling of  
251 the protein (by clicking complementary fluorophores), a small amount of unspecific  
252 binding was detected (Fig. 6B). Again, the SPAAC (Gly2113AzPhe mutant BCN-  
253 POE<sub>3</sub>-NH-DY649P1 conjugate) seems to be more efficient than the IEDDAC  
254 (Leu2166NorLys2 mutant 6-methyl-tetrazine-ATTO-647N conjugate) (Fig. 6B).  
255 Fluorescence detected for Gly2113AzPhe mutant BCN-POE<sub>3</sub>-NH-DY649P1  
256 conjugate is higher than for the wild type CoA 647 conjugate, which may be



257 explained with incomplete phosphopantetheinylation of the reference protein and  
258 some amount of unspecific binding of the BCN-POE<sub>3</sub>-NH-DY649P1 fluorophore.

259

## 260 Discussion

261 The last decades have shown amber codon suppression to be a powerful tool to  
262 investigate structure and function of proteins. The opportunity to label site-specifically  
263 with bioorthogonal functional groups has led to novel biophysical probes *in vitro* and  
264 *in vivo*<sup>19,20,44-46</sup>. So far, this technique has commonly been used to study small  
265 proteins, but has not been applied for large and complex multidomain systems.

266 Conformational variability is a fundamental property for the catalysis of many  
267 enzymes and especially megaenzymes as the animal FAS<sup>6-8,13</sup>. Here, we establish  
268 an efficient way to incorporate ncAAs site-specifically with subsequent labelling.  
269 Such probes make a range of biological applications accessible, such as  
270 photocrosslinking, electron paramagnetic resonance (EPR) spectroscopy, and FRET  
271 spectroscopy<sup>44,47,48</sup>. In case of animal FAS, labelled proteins would for example offer  
272 the prospect of addressing some of the fundamental questions to carrier domain-  
273 mediated substrate shuttling, i.e. towards the time scale of domain-domain  
274 interactions, or the influence of loaded intermediates on the mobility of the ACP  
275 domain.

276 Recently, we have established recombinant expression and purification of mFAS in  
277 *E. coli*<sup>49</sup>. Further, we have demonstrated that also parts and single domains of mFAS  
278 can be expressed individually, yielding for example the ACP domain as freestanding  
279 protein in high yields. Still incorporation of ncAAs by amber codon suppression into  
280 such a complex enzyme remains a challenging attempt, owing to the sensitivity of the  
281 protein to buffer and temperature changes as well as salt concentrations<sup>50</sup>. To  
282 circumvent high consumption of resources, we decided to approach this task by  
283 reducing complexity as far as possible. Specifically, we focused on the small ACP  
284 domain, and scaled down expression volumes to 2 mL cultures, which can be  
285 conveniently handled and analysed in 96-well format. In order to achieve a fast  
286 screening of amber codon suppression conditions, we fused the fluorescent protein  
287 GFP C-terminally to the ACP domain. This set-up allows to easily monitor the  
288 incorporation of the ncAA by the fluorescence emerging from the full-length fusion  
289 construct only.

290 Employing this set-up, we have compared two reported plasmid systems<sup>27,28</sup>, and  
291 tested the incorporation efficiency of eight different ncAAs, which predominantly  
292 allow copper-free click chemistry (Fig. 2A). For our set-up, the two suppressor  
293 plasmids pAC<sup>U</sup> and pAC<sup>E</sup>, derived from pUltra and pEvol vectors, respectively,  
294 performed similarly well. The pAC<sup>U</sup> vector has finally been used for its ease in protein  
295 production, as not requiring additional induction of the suppression system along with  
296 the protein of interest. In general, the TyrRS from *M. jannaschii* performed much  
297 better than the PylRS from *M. mazei* or *M. bakeri*, as the latter suffered from a high  
298 tendency to aggregate in *E. coli*<sup>51,52</sup>. As the two ncAAs AzPhe and NorLys2 showed  
299 optimal incorporation efficiencies of 26-35% and allow copper-free click chemistry,  
300 we chose to proceed further with these ncAAs incorporated with the pAC<sup>U</sup> vector.

301 In addition to the choice of a suppression system, the reporter assay revealed that  
302 the site of ncAA incorporation in the ACP fold was critical for suppression efficiency<sup>41</sup>.  
303 Although all amber mutation sites were placed on the surface of the ACP domain, to  
304 avoid disturbing the protein fold or any protein-protein interactions in mFAS, both  
305 ncAAs were differently sensitive to incorporation sites. Whereas AzPhe was tolerated  
306 at all tested sites, NorLys2 was only introduced sufficiently into a disordered loop  
307 region. The higher tolerance to incorporate AzPhe at different positions may be  
308 explained by its smaller size preserving the integrity of the ACP fold.

309 Overall, the results of the upscale experiment and the reporter assay agree with one  
310 another. Incorporation efficiencies of the two different ncAAs at 5 different mutation  
311 sites were in line with data received from the reporter assay, with the only exception  
312 of NorLys2 incorporation at site Gly01. From SEC profiles of purified proteins, we  
313 were further able to conclude, that modification with ncAAs did not disturb the protein  
314 fold. With a drop in expression yield to 30–40% of the non-mutated reference  
315 construct, also the access to the protein remained satisfyingly high. As a quality  
316 control, we finally also employed the constructs in testing bioconjugation with  
317 fluorophores. Although there is a discrepancy between the DOL determined using  
318 relative in-gel fluorescence intensities and UV-Vis absorbance, both methods agreed  
319 that for our set-up the azido-BCN reaction is more efficient than the norbornene-  
320 tetrazine reaction. The labelling of the mFAS mutants Gly2113AzPhe and  
321 Leu2166NorLys2 finally led to two fluorescent probes, which can readily be subjected  
322 to fluorescence spectroscopic analysis<sup>16</sup>.

323 These results demonstrate the successful incorporation of ncAAs into a 540 kDa  
324 homodimer by amber codon suppression, with subsequent fluorescent labelling.

325 Such a systematic approach is necessary to tackle the challenges in application of  
326 amber codon suppression for multidomain proteins, comprising of a reporter assay  
327 on a single domain with upscaling of the culture volume and final modification of the  
328 full-length protein. Together, this procedure may be applied to any comparable  
329 biological system and can become a powerful tool to elucidate structure and  
330 conformational properties of multidomain proteins, as e.g. the homologous PKS  
331 family.

## 332 Methods

### 333 Cloning of suppressor plasmids pAC<sup>U</sup> & pAC<sup>E</sup>

334 Suppressor plasmids pAC were constructed based on pUltra and pEVOL, as had  
335 been published by the lab of Schultz and coworkers<sup>27,28</sup>, by assembling cassettes  
336 amplified from the commercially available plasmids pCDF1b, pMAL-c5G and  
337 pEVOL\_pBpF (was a gift from Peter Schultz (Addgene plasmid # 31190)). Phusion  
338 polymerase (Clontech) was used to generate PCR fragments, which were assembled  
339 with help of complementary primer overhang in a MegaPrimer PCR and  
340 subsequently cloned into the backbone using InFusion Cloning (Takara Bio). The  
341 pAC<sup>U</sup> plasmids encode one copy of aaRS and suppressor tRNA under the tac  
342 promoter and rrnB terminator, and the proK promoter and proK terminator,  
343 respectively. The backbone of the pAC<sup>U</sup> contains a CDF origin, spectinomycin  
344 resistance and *lacI* gene. The pAC<sup>E</sup> plasmids encode two copies of aaRS, one under  
345 the arabinose promoter and the rrnB terminator, and one under the glnS' promoter  
346 and glnS terminator, as well as one copy of suppressor tRNA under the proK  
347 promoter and proK terminator. The backbone of the pAC<sup>E</sup> contains a p15A origin,  
348 chloramphenicol resistance and *araC* gene. Multiple point mutations were introduced  
349 to create a set of evolved aaRSs, specific for certain ncAAs. Three different sets of  
350 orthogonal suppressor pairs (aaRS/tRNA), derived from *M. jannaschii*, *M. mazei* and  
351 *M. barkeri*, are available. Genes of the orthogonal pair mmPylRS/tRNA were  
352 obtained from plasmid pJZ, which was a gift from Nediljko Budisa, and mbPylRS was  
353 obtained from pAcBac1.tR4-MbPyl, which was a gift from Peter Schultz (Addgene  
354 plasmid # 50832). Stellar cells were used for plasmid amplification. All mutations  
355 were confirmed by sequencing (Seqlab).

### 356 Cloning of ACP-GFP-fusion constructs and amber mutations

357 The genes for ACP-GFP fusion constructs were cloned into a pET22b vector, which  
358 contains a pBR322 origin, ampicillin resistance and *lacI* gene. They are encoded  
359 under a T7 promoter and terminator, and feature a N-terminal Strep-tag and C-  
360 terminal His8-tag. The ACP-GFP construct termed wild type in this study contained a  
361 Met72Leu mutation, to prevent an alternative translation start and to reduce  
362 background GFP-fluorescence. An amber mutation was introduced site-specifically in  
363 the wild type gene and its position was varied throughout the ACP sequence to  
364 generate six different ACP-GFP mutant constructs, with different incorporation sites.

### 365 General protein expression procedure

366 All constructs were transformed in *E. coli* BL21 Gold (DE3) cells (Agilent  
367 Technologies) following the provided protocol. For incorporation of ncAAs, plasmids  
368 encoding ACP-GFP constructs with amber mutations were co-transformed with the  
369 appropriate suppressor plasmid pAC<sup>U</sup> or pAC<sup>E</sup>. LB agar (Lennox) transformation  
370 plates contained 1% glucose to suppress leaky expression, and were supplemented  
371 with either 100 µg/mL ampicillin for transformation of the ACP-GFP wild type,  
372 50 µg/mL ampicillin and 25 µg/mL spectinomycin for co-transformation with pAC<sup>U</sup>  
373 plasmids, or 50 µg/mL ampicillin and 17 µg/mL chloramphenicol for co-  
374 transformation with pAC<sup>E</sup> plasmids. Colonies were grown at 37 °C overnight or at  
375 room temperature over weekend and stored at 4 °C up to several weeks. A randomly  
376 picked single clone was used to inoculate a pre-culture of Lysogeny Broth,  
377 supplemented with 1% glucose and respective antibiotics, which was grown at 37 °C  
378 and 180 rpm overnight. The pre-culture was used to inoculate Terrific Broth medium,  
379 supplemented with respective antibiotics. The cells were cultivated at 37 °C and  
380 140–180 rpm until an OD<sub>600</sub> of 0.5–0.7 was reached. The expression culture was  
381 supplemented with 2 mM final concentration of the ncAA and expression of the ACP-  
382 GFP constructs was induced with 0.25 mM final concentration of IPTG. Since the  
383 genes of pAC<sup>U</sup> plasmids stand under a *tac* promoter, no additional induction was  
384 needed, whereas expression of the orthogonal suppressor pair from pAC<sup>E</sup> plasmids  
385 was induced additionally with 0.02% final concentration of arabinose. Protein  
386 expression was carried out at 20 °C and 140–180 rpm overnight.

387

## 388 Reporter assay

389 The reporter assay was performed in 2 mL scale in 96-well deep well plates in  
390 technical triplicates, using an ACP-GFP wild type construct without amber mutation  
391 as reference and negative samples of each construct without addition of ncAA. The  
392 cells were harvested by centrifugation (3,220 rcf for 5 min at 4 °C), washed and  
393 resuspended in 300 µL PBS.

## 394 Expression of ACP-GFP constructs

395 Large scale expression of ACP-GFP constructs was carried out in 200 mL  
396 expression cultures. Prior to harvesting the cells by centrifugation (4,000 rcf for  
397 20 min at 4 °C), 2 mL samples of cell cultures were taken for further quantification  
398 using GFP-fluorescence and western blot. All cell pellets were flash frozen in liquid  
399 nitrogen and stored at -80 °C until use.

## 400 Expression of mFAS constructs

401 Large scale expression of mFAS constructs was carried out in 1 L expression  
402 cultures. The cells were harvested by centrifugation (4,000 rcf for 20 min at 4 °C) and  
403 subsequently purified.

## 404 Purification of ACP-GFP constructs

405 The cell pellets were thawed on ice and resuspended in 10 mL His buffer (50 mM  
406 KPi, 200 mM NaCl, 20 mM imidazole, 10% glycerol, pH 7.4) containing DNase I and  
407 1 mM EDTA. French pressure cell press was used for mechanical disruption at a  
408 pressure of 1000 bar and the cell debris was removed by centrifugation (50,000 rcf  
409 for 30 min at 4 °C). After addition of 2 mM MgCl<sub>2</sub>, the lysate was subjected to 3 mL  
410 (bead capacity 50 mg/mL) Ni-NTA Superflow resin (QIAGEN) and incubated for 1 h  
411 at 4 °C. Unbound protein was washed off with 5 column volumes His buffer and  
412 bound His-tagged protein was eluted with 2.5 column volumes His buffer containing  
413 300 mM imidazole and additional 2 column volumes of His buffer with imidazole  
414 increased to 500 mM. The elution fractions were analysed by SDS-PAGE and size  
415 exclusion chromatography (SEC) over a Superdex 200 Increase 10/300 GL column  
416 (His buffer filtered and degassed). Protein samples were concentrated using an  
417 Amicon Ultra concentration device (Millipore), flash frozen in liquid nitrogen, and  
418 stored at -80 °C.

419

#### 420 Purification of ACP-GFP fluorophore conjugates

421 Excess fluorophore from bioconjugation reaction was removed by purification over  
422 1 mg HisPur Ni-NTA Magnetic Beads (Thermo Fisher Scientific). At each purification  
423 step the beads were shortly vortexed, spun down and placed in a magnetic stand, so  
424 the liquid phase could be taken up with a pipette. The Ni-NTA beads were first  
425 equilibrated with 160  $\mu$ L and additional 400  $\mu$ L His buffer (50 mM KPi, 200 mM NaCl,  
426 20 mM imidazole, 10% glycerol, pH 7.4). The bioconjugation reaction was diluted  
427 with one volume of His buffer and incubated with the Ni-NTA beads for 30 min in the  
428 dark on an end-over-end rotator. Unbound protein was washed off with two times  
429 400  $\mu$ L His buffer. In two elution steps, the bound His-tagged protein was incubated  
430 for 30 min, and 15 min respectively, in the dark on an end-over-end rotator with  
431 50  $\mu$ L His buffer containing 300 mM imidazole.

#### 432 Purification of mFAS constructs

433 The cell pellets were resuspended in 30 mL His buffer (50 mM NaPi, 450 mM NaCl,  
434 10 mM imidazole, 20% glycerol, pH 7.6) containing DNase I and 1 mM EDTA.  
435 French pressure cell press was used for mechanical disruption at a pressure of  
436 1000 bar and the cell debris was removed by centrifugation (50,000 rcf for 30 min at  
437 4 °C). After addition of 2 mM  $MgCl_2$ , the protein was bound to Ni-NTA resin  
438 (QIAGEN) and eluted at 300 mM imidazole. Additionally to Ni-IMAC the mFAS  
439 constructs were purified over a Strep-column (Iba), eluted with 2.5 mM desthiobiotin  
440 (Strep buffer: 250 mM KPi, 1 mM EDTA, 1 mM DTT, 10% glycerol, pH 7.4). Further  
441 purification was performed by size exclusion chromatography over a Superdex 200  
442 Increase 10/300 GL column (Strep buffer filtered and degassed). Protein samples  
443 were concentrated using an Amicon Ultra concentration device (Millipore), flash  
444 frozen in liquid nitrogen, and stored at -80 °C.

#### 445 Quantification of GFP-fluorescence

446 The reporter assay samples and the 2 mL samples from large scale ACP-GFP  
447 expression were analysed by their GFP-fluorescence. An undiluted sample or 10–  
448 fold dilution of the resuspended cells in PBS was transferred into 96-well plates and  
449  $OD_{600}$  and GFP fluorescence was measured at CLARIOstar (BMG). Blank corrected  
450 fluorescence values were normalized by  $OD_{600}$ . Fluorescence intensity of the wild  
451 type was set to 100% and all other fluorescence signals were related to the wild type.

452



#### 453 Mass spectrometric protein analysis

454 Purified protein was analysed using nanoESI (Synapt G2-S) mass spectrometry.  
455 Protein buffer of the sample was changed to 0.1-1 M ammonium acetate in an  
456 Amicon Ultra concentration device (Millipore). Protein concentration of the samples  
457 was 1 mg/mL.

#### 458 Western blot analysis

459 From large scale mFAS expression cultures, 2 mL samples were taken for western  
460 blot analysis. OD<sub>600</sub> from a 10-fold dilution was measured and the cells were  
461 normalized to an OD<sub>600</sub> of 8. A small sample was analysed on a SDS-PAGE. The  
462 proteins were transferred from the analytical polyacrylamide gel onto a PVDF-  
463 membrane by an electrophoretic tank-blot method (25 V for 1 h). The membrane was  
464 subsequently blocked with 0.2% I-Block and 0.1% Tween-20 in PBS, treated first  
465 with monoclonal mouse anti-Strep antibody (StrepMAB classic, Iba) and monoclonal  
466 rabbit anti-His antibody (bethyl) (at 4 °C overnight), and secondly with IgG donkey  
467 anti-mouse DyLight 755 and IgG goat anti-rabbit DyLight 633 (Thermo Scientific)  
468 (light-protected at room temperature for 1 h). Excess antibodies were washed off in  
469 several washing steps with 0.2% I-Block and 0.1% Tween-20 in PBS. The western  
470 blot was developed at the Fusion SL Fluorescence Imaging System (Vilber Lourmat)  
471 with excitation in the near infrared to infrared range and using the emission filters F-  
472 695 Y5 and F-820.

#### 473 Fluorescent bioconjugation

474 Bioconjugation of fluorophore (20–150 equiv.) and protein (1 equiv.) was performed  
475 in a copper-free environment at room temperature in the dark. The reaction  
476 proceeded in 25–100 µL His buffer for up to 4 hours. Protein mutants with the AzPhe  
477 were treated with the fluorophore BCN-POE<sub>3</sub>-NH-DY649P1, and mutants with the  
478 NorK2 were treated with 6-Methyl-tetrazine-ATTO-647N. Wild type ACP-GFP served  
479 as negative control, treated with the same fluorophores under the same conditions.  
480 As reference, 1 equiv. wild type ACP was phosphopantetheinylated with 5 equiv. of  
481 the fluorescent substrate CoA 647 (NEB), catalysed by 0.5 equiv. 4'-  
482 phosphopantetheinyl transferase Sfp from *B. subtilis*. The phosphopantetheinylation  
483 was performed in presence of 10 mM MgCl<sub>2</sub> for 30–45 min at 37 °C in the dark.  
484 Subsequent to bioconjugation, an analytical SDS-PAGE was performed and  
485 fluorescent protein bands were detected at the Fusion SL Fluorescence Imaging  
486 System (Vilber Lourmat) with excitation in the near infrared range and using emission



487 filter F-695 Y5. The FusionCapt Advance Solo 4 16.08a software was used to  
488 quantify the fluorescence of the protein bands on the polyacrylamide gel.

#### 489 UV-Vis spectra

490 UV-Vis spectra were recorded on a Carry 100 UV-Vis spectrophotometer (Agilent  
491 Technologies) from 800 nm to 220 nm wavelength in quartz glass cuvettes (50  $\mu$ L  
492 sample). Excess fluorophore had been removed by purification over HisPur Ni-NTA  
493 Magnetic Beads (Thermo Fisher Scientific). The reference sample contained His  
494 buffer with 300 mM imidazole. Absorption at 650 nm (maximum absorption of the  
495 fluorophore) and at 485 nm (maximum absorption of GFP) was used to determine  
496 the degree of labelling, following equation  $DOL = \frac{A_{max}\epsilon_{GFP}}{(A_{GFP} - A_{max}CF_{485})\epsilon_{max}}$ , with  $\epsilon_{GFP}$  and  
497  $\epsilon_{max}$  being the molar extinction coefficients of GFP and the fluorophores, respectively.

498 The correction factor  $CF_{485} = \frac{A_{485}}{A_{max}}$  was determined from the absorption spectrum of  
499 the free fluorophore in water. All values for calculation are summarized in table 1.

500 Table 1: Calculation of the DOL with optical properties of used fluorophores

| Fluorophore | $A_{GFP}$ (mAU) | $\epsilon_{GFP}$ (L mol <sup>-1</sup> cm <sup>-1</sup> ) | $A_{max}$ (mAU) | $\epsilon_{max}$ (L mol <sup>-1</sup> cm <sup>-1</sup> ) | $CF_{485}$ |
|-------------|-----------------|----------------------------------------------------------|-----------------|----------------------------------------------------------|------------|
| DY647P1     | 0.674271762     | 83300                                                    | 1.49885743      | 250000                                                   | 0.006      |
| DY649P1     | 0.454478949     | 83300                                                    | 0.858465344     | 250000                                                   | 0.004      |
| ATTO-647N   | 0.479153782     | 83300                                                    | 0.316676229     | 150000                                                   | 0.013      |

501

#### 502 Data Availability

503 All data generated or analysed during this study are included in this published article  
504 and its Supplementary Information files. The plasmids (pAC<sup>U</sup> and pAC<sup>E</sup>) generated  
505 during the current study are available from the corresponding author on reasonable  
506 request.

507

## 508 References

- 509 1 Chang, S.-I. & Hammes, G. G. Structure and Mechanism of Action of a  
510 Multifunctional Enzyme: Fatty Acid Synthase. *Acc. Chem. Res.* **23**, 363-369  
511 (1990).
- 512 2 Maier, T., Leibundgut, M., Boehringer, D. & Ban, N. Structure and function of  
513 eukaryotic fatty acid synthases. *Q. Rev. Biophys.* **43**, 373-422 (2010).
- 514 3 Barajas, J. F., Blake-Hedges, J. M., Bailey, C. B., Curran, S. & Keasling, J. D.  
515 Engineered polyketides: Synergy between protein and host level engineering.  
516 *Synth. Syst. Biotechnol.* **2**, 147-166 (2017).
- 517 4 Hertweck, C. The Biosynthetic Logic of Polyketide Diversity. *Angew. Chem.*  
518 *Int. Ed.* **48**, 4688–4716 (2009).
- 519 5 Smith, S. & Tsai, S.-C. The type I fatty acid and polyketide synthases: a tale  
520 of two megasynthases. *Nat. Prod. Rep.* **24**, 1041-1072 (2007).
- 521 6 Maier, T., Leibundgut, M. & Ban, N. The Crystal Structure of a Mammalian  
522 Fatty Acid Synthase. *Science* **321**, 1315-1322, doi:10.1126/science.1161269  
523 (2008).
- 524 7 Viegas, M. F., Neves, R. P. P., Ramos, M. J. & Fernandes, P. A. Modeling of  
525 Human Fatty Acid Synthase and *in Silico* Docking of Acyl Carrier Protein  
526 Domain and Its Partner Catalytic Domains. *J. Phys. Chem. B* **122**, 77-85  
527 (2017).
- 528 8 Brignole, E. J., Smith, S. & Asturias, F. J. Conformational flexibility of  
529 metazoan fatty acid synthase enables catalysis. *Nat. Struct. Mol. Biol.* **16**,  
530 190-197, doi:10.1038/nsmb.1532 (2009).
- 531 9 Anselmi, C., Grininger, M., Gipson, P. & Faraldo-Gómez, J. D. Mechanism of  
532 Substrate Shuttling by the Acyl-Carrier Protein within the Fatty Acid Mega-  
533 Synthase. *J. Am. Chem. Soc.* **132**, 12357-12364, doi:10.1021/ja103354w  
534 (2010).
- 535 10 Weissman, K. J. The structural biology of biosynthetic megaenzymes. *Nat.*  
536 *Chem. Biol.* **11**, 660-670 (2015).
- 537 11 Rittner, A. & Grininger, M. Modular Polyketide Synthases (PKSs): A New  
538 Model Fits All? *ChemBioChem* **15**, 2489-2493 (2014).
- 539 12 Jenni, S. *et al.* Structure of Fungal Fatty Acid Synthase and Implications for  
540 Iterative Substrate Shuttling. *Science* **316**, 254-261 (2007).
- 541 13 Chang, S.-I. & Hammes, G. G. Amino Acid Sequences of Pyridoxal 5'-  
542 Phosphate Binding Sites and Fluorescence Resonance Energy Transfer in  
543 Chicken Liver Fatty Acid Synthase. *Biochemistry* **28**, 3781-3788 (1989).
- 544 14 Yuan, Z. & Hammes, G. G. Fluorescence Studies of Chicken Liver Fatty Acid  
545 Synthase. *J. Biol. Chem.* **261**, 13643-13651 (1986).
- 546 15 Benning, F. M. C. *et al.* High-Speed Atomic Force Microscopy Visualization of

- 547 the Dynamics of the Multienzyme Fatty Acid Synthase. *ACS Nano* **11**, 10852-  
548 10859, doi:10.1021/acsnano.7b04216 (2017).
- 549 16 Roy, R., Hohng, S. & Ha, T. A practical guide to single-molecule FRET. *Nat*  
550 *Meth* **5**, 507-516 (2008).
- 551 17 Hohlbein, J., Gryte, K., Heilemann, M. & Kapanidis, A. N. Surfing on a new  
552 wave of single-molecule fluorescence methods. *Phys. Biol.* **7**, 1-22 (2010).
- 553 18 Kim, Y. *et al.* Efficient Site-Specific Labeling of Proteins via Cysteines.  
554 *Bioconjugate Chem.* **19**, 786-791 (2008).
- 555 19 Lang, K. & Chin, J. W. Cellular incorporation of unnatural amino acids and  
556 bioorthogonal labeling of proteins. *Chem. Rev.* **114**, 4764-4806,  
557 doi:10.1021/cr400355w (2014).
- 558 20 Liu, C. C. & Schultz, P. G. Adding New Chemistries to the Genetic Code.  
559 *Annu. Rev. Biochem.* **79**, 413-444,  
560 doi:10.1146/annurev.biochem.052308.105824 (2010).
- 561 21 Tsien, R. Y. The green fluorescent protein. *Annu. Rev. Biochem.* **67**, 509-544  
562 (1998).
- 563 22 Rostovtsev, V. V., Green, L. G., Fokin, V. V. & Sharpless, K. B. A stepwise  
564 Huisgen cycloaddition process: copper(I)-catalyzed regioselective "ligation" of  
565 azides and terminal alkynes. *Angew. Chem. Int. Ed. Engl.* **41**, 2596-2599  
566 (2002).
- 567 23 Dommerholt, J. *et al.* Readily Accessible Bicyclononynes for Bioorthogonal  
568 Labeling and Three-Dimensional Imaging of Living Cells. *Angew. Chem. Int.*  
569 *Ed.* **49**, 9422-9425, doi:10.1002/anie.201003761 (2010).
- 570 24 Lang, K. *et al.* Genetically encoded norbornene directs site-specific cellular  
571 protein labelling via a rapid bioorthogonal reaction. *Nat. Chem.* **4**, 298-304,  
572 doi:10.1038/nchem.1250 (2012).
- 573 25 Hahn, A., Reschke, S., Leimkühler, S. & Risse, T. Ketoxime Coupling of *p*-  
574 Acetylphenylalanine at Neutral pH for Site-Directed Spin Labeling of Human  
575 Sulfite Oxidase. *The Journal of Physical Chemistry B* **118**, 7077-7084,  
576 doi:10.1021/jp503471j (2014).
- 577 26 Choudhary, C. *et al.* Lysine Acetylation Targets Protein Complexes and Co-  
578 Regulates Major Cellular Functions. *Science* **325**, 834-840 (2009).
- 579 27 Chatterjee, A., Sun, S. B., Furman, J. L., Xiao, H. & Schultz, P. G. A versatile  
580 platform for single- and multiple-unnatural amino acid mutagenesis in  
581 *Escherichia coli*. *Biochemistry* **52**, 1828-1837, doi:10.1021/bi4000244 (2013).
- 582 28 Young, T. S., Ahmad, I., Yin, J. A. & Schultz, P. G. An Enhanced System for  
583 Unnatural Amino Acid Mutagenesis in *E. coli*. *J. Mol. Biol.* **395**, 361-374,  
584 doi:10.1016/j.jmb.2009.10.030 (2010).
- 585 29 Chin, J. W. *et al.* Addition of *p*-Azido- L-phenylalanine to the Genetic Code of  
586 *Escherichia coli*. *J. Am. Chem. Soc.* **124**, 9026-9027, doi:10.1021/ja027007w  
587 (2002).

- 588 30 Kaya, E. *et al.* A Genetically Encoded Norbornene Amino Acid for the Mild  
589 and Selective Modification of Proteins in a Copper-Free Click Reaction.  
590 *Angew. Chem. Int. Ed.* **51**, 4466-4469, doi:10.1002/anie.201109252 (2012).
- 591 31 Schneider, S. *et al.* Structural Insights into Incorporation of Norbornene  
592 Amino Acids for Click Modification of Proteins. *ChemBioChem* **14**, 2114-  
593 2118, doi:10.1002/cbic.201300435 (2013).
- 594 32 Borrmann, A. *et al.* Genetic Encoding of a Bicyclo[6.1.0]nonyne-Charged  
595 Amino Acid Enables Fast Cellular Protein Imaging by Metal-Free Ligation.  
596 *ChemBioChem* **13**, 2094-2099 (2012).
- 597 33 Deiters, A. & Schultz, P. G. *In vivo* incorporation of an alkyne into proteins in  
598 *Escherichia coli*. *Bioorg. Med. Chem. Lett.* **15**, 1521-1524,  
599 doi:10.1016/j.bmcl.2004.12.065 (2005).
- 600 34 Seitchik, J. L. *et al.* Genetically Encoded Tetrazine Amino Acid Directs Rapid  
601 Site-Specific *in Vivo* Bioorthogonal Ligation with *trans*-Cyclooctenes. *J. Am.*  
602 *Chem. Soc.* **134**, 2898-2901, doi:10.1021/ja2109745 (2012).
- 603 35 Nguyen, D. P. *et al.* Genetic Encoding and Labeling of Aliphatic Azides and  
604 Alkynes in Recombinant Proteins *via* a Pyrrolysyl-tRNA Synthetase/tRNA<sub>CUA</sub>  
605 Pair and Click Chemistry. *J. Am. Chem. Soc.* **131**, 8720-8721 (2009).
- 606 36 Umehara, T. *et al.* N-Acetyl lysyl-tRNA synthetases evolved by a CcdB-based  
607 selection possess N-acetyl lysine specificity *in vitro* and *in vivo*. *FEBS Lett.*  
608 **586**, 729-733, doi:10.1016/j.febslet.2012.01.029 (2012).
- 609 37 Kobayashi, T. *et al.* Structural basis for orthogonal tRNA specificities of  
610 tyrosyl-tRNA synthetases for genetic code expansion. *Nat. Struct. Biol.* **10**,  
611 425-432 (2003).
- 612 38 Wang, Y.-S., Fang, X., Wallace, A. L., Wu, B. & Liu, W. R. A Rationally  
613 Designed Pyrrolysyl-tRNA Synthetase Mutant with a Broad Substrate  
614 Spectrum. *J. Am. Chem. Soc.* **134**, 2950-2953, doi:10.1021/ja211972x  
615 (2012).
- 616 39 Young, D. D. *et al.* An Evolved Aminoacyl-tRNA Synthetase with Atypical  
617 Polysubstrate Specificity. *Biochemistry* **50**, 1894-1900,  
618 doi:10.1021/bi101929e (2011).
- 619 40 Schultz, K. C. *et al.* A Genetically Encoded Infrared Probe. *J. Am. Chem.*  
620 *Soc.* **128**, 13984-13985, doi:10.1021/ja0636690 (2006).
- 621 41 Pott, M., Schmidt, M. J. & Summerer, D. Evolved Sequence Contexts for  
622 Highly Efficient Amber Suppression with Noncanonical Amino Acids. *ACS*  
623 *Chem. Biol.* **9**, 2815-2822 (2014).
- 624 42 Quadri, L. E. N. *et al.* Characterization of Sfp, a *Bacillus subtilis*  
625 Phosphopantetheinyl Transferase for Peptidyl Carrier Protein Domains in  
626 Peptide Synthetases. *Biochemistry* **37**, 1585-1595 (1998).
- 627 43 Lee, K. K., Da Silva, N. A. & Kealey, J. T. Determination of the extent of  
628 phosphopantetheinylation of polyketide synthases expressed in *Escherichia*  
629 *coli* and *Saccharomyces cerevisiae*. *Anal. Biochem.* **394**, 75-80,

- 630           doi:10.1016/j.ab.2009.07.010 (2009).
- 631    44    Tyagi, S. & Lemke, E. A. Single-molecule FRET and crosslinking studies in  
632    structural biology enabled by noncanonical amino acids. *Curr. Opin. Struct.*  
633    *Biol.* **32**, 66-73, doi:10.1016/j.sbi.2015.02.009 (2015).
- 634    45    Chin, J. W. Expanding and Reprogramming the Genetic Code of Cells and  
635    Animals. *Annu. Rev. Biochem.* **83**, 379-408, doi:10.1146/annurev-biochem-  
636    060713-035737 (2014).
- 637    46    Kim, C. H., Axup, J. Y. & Schultz, P. G. Protein conjugation with genetically  
638    encoded unnatural amino acids. *Curr. Opin. Chem. Biol.* **17**, 412-419,  
639    doi:10.1016/j.cbpa.2013.04.017 (2013).
- 640    47    Hubbell, W. L., Cafiso, D. S. & Altenbach, C. Identifying conformational  
641    changes with site-directed spin labeling. **7**, 735-739 (2000).
- 642    48    Schmidt, M. J. *et al.* EPR Distance Measurements in Native Proteins with  
643    Genetically Encoded Spin Labels. *ACS Chem. Biol.* **10**, 2764-2771,  
644    doi:10.1021/acscchembio.5b00512 (2015).
- 645    49    Rittner, A., Paithankar, K. S., Huu, K. V. & Grininger, M. Characterization of  
646    the Polyspecific Transferase of Murine Type I Fatty Acid Synthase (FAS) and  
647    Implications for Polyketide Synthase (PKS) Engineering. *ACS Chem. Biol.*,  
648    doi:10.1021/acscchembio.7b00718 (2018).
- 649    50    Rangan, V. S., Joshi, A. K. & Smith, S. Mapping the Functional Topology of  
650    the Animal Fatty Acid Synthase by Mutant Complementation *in Vitro*.  
651    *Biochemistry* **40**, 10792-10799, doi:10.1021/bi015535z (2001).
- 652    51    Wan, W., Tharp, J. M. & Liu, W. R. Pyrrolysyl-tRNA synthetase: An ordinary  
653    enzyme but an outstanding genetic code expansion tool. *Biochim. Biophys.*  
654    *Acta* **1844**, 1059-1070, doi:10.1016/j.bbapap.2014.03.002 (2014).
- 655    52    Jiang, R. & Krzycki, J. A. PylSn and the homologous N-terminal domain of  
656    pyrrolysyl-tRNA synthetase bind the tRNA that is essential for the genetic  
657    encoding of pyrrolysine. *J. Biol. Chem.* **287**, 32738-32746,  
658    doi:10.1074/jbc.M112.396754 (2012).
- 659
- 660
- 661

## 662 **Acknowledgements**

663 We thank Khanh Vu Huu, Kudratullah Karimi and Prof. Nina Morgner for mass  
664 spectrometry analysis of proteins. We are also grateful to students Sina Manger and  
665 Vanessa Bause for assistance in the lab. We are thankful to Prof. Nediljko Budisa for  
666 supporting us at the beginning of the project. We would also like to thank Dr. Karthik  
667 Paithankar for proof-reading the manuscript.

668

## 669 **Author contribution**

670 C.S.H. and A.R. performed molecular cloning of suppressor plasmids and plasmids  
671 encoding ACP-GFP and mFAS constructs. A.R. established expression and  
672 purification of mFAS. C.S.H. performed reporter assays, protein expression,  
673 purification experiments, fluorescent labelling and analysed corresponding data. B.G.  
674 and D.B. carried out experiments and assisted to establish the method under  
675 supervision of C.S.H. and A.R.. A.R. and B.G. synthesized ncAAs. A.R. conceived  
676 the project, which was further developed together with C.S.H.. M.G. designed the  
677 research and analysed data. C.S.H., A.R. and M.G. wrote the manuscript.

678

## 679 **Additional Information**

### 680 **Funding sources**

681 This work was supported by the Cluster of Excellence Frankfurt (CEF)  
682 “Macromolecular complexes” at the Goethe University Frankfurt (CEF Adjunct  
683 Investigatorship to M.G.) and by a Lichtenberg grant of the Volkswagen Foundation  
684 to M.G. (grant number 85701). Further support was received by the LOEWE program  
685 (Landes-Offensive zur Entwicklung wissenschaftlich-ökonomischer Exzellenz) of the  
686 state of Hesse conducted within the framework of the MegaSyn Research Cluster.

687 **Supporting Information** accompanies this paper and is available online.

### 688 **Competing financial interests**

689 The authors declare no competing financial interests.

690



691 **Figure Legends**

692

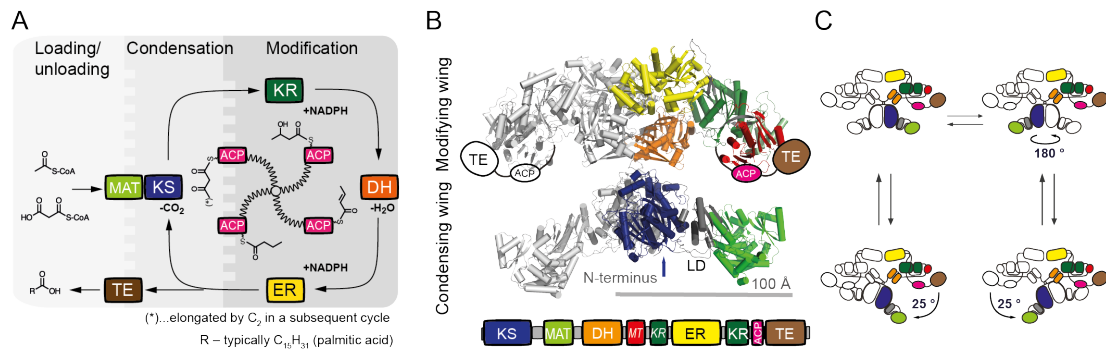

693

694 **Figure 1: Overview of animal fatty acid synthesis.** A) Fatty acid synthesis as occurring in  
695 animals. The fatty acid, typically palmitic acid, is produced from the substrates acetyl-CoA,  
696 malonyl-CoA and NADPH. The acetyl moiety is sequentially elongated and modified by  
697 several domains until a certain chain length (C<sub>16</sub>) is reached and the final product is released  
698 from the enzyme as a free fatty acid. During the whole process all intermediates remain  
699 covalently attached to the enzyme, mainly to the ACP domain, which requires a high  
700 conformational freedom of FAS to facilitate productive interactions between the ACP domain  
701 and all catalytically active sites. Domain nomenclature: KS (ketoacyl synthase), KR (ketoacyl  
702 reductase), DH (dehydratase), ER (enoyl reductase), ACP (acyl carrier protein), TE  
703 (thioesterase), MAT (malonyl/acetyltransferase). B) Cartoon depiction of the dimeric “X”-  
704 shaped structure of porcine FAS<sup>6</sup>.  $\alpha$ -Helices are shown as cylinders. One half of the dimer is  
705 coloured according to the attached domain overview. Owing to their high positional variability,  
706 ACP and TE could not be traced in electron density, but are schematically drawn for clarity.  
707 KR and MT (methyltransferase) refer to non-catalytic folds, which have structural tasks and  
708 may confine the ACP during substrate shuttling. C) Conformational dynamics of animal FAS.  
709 Swinging and swivelling motions around the flexible hinge region have been observed by  
710 single particle EM and high-speed atomic force microscopy<sup>8,15</sup>. Full rotation of the condensing  
711 wing by 180° was further confirmed by mutagenesis studies<sup>50</sup>.

712

713



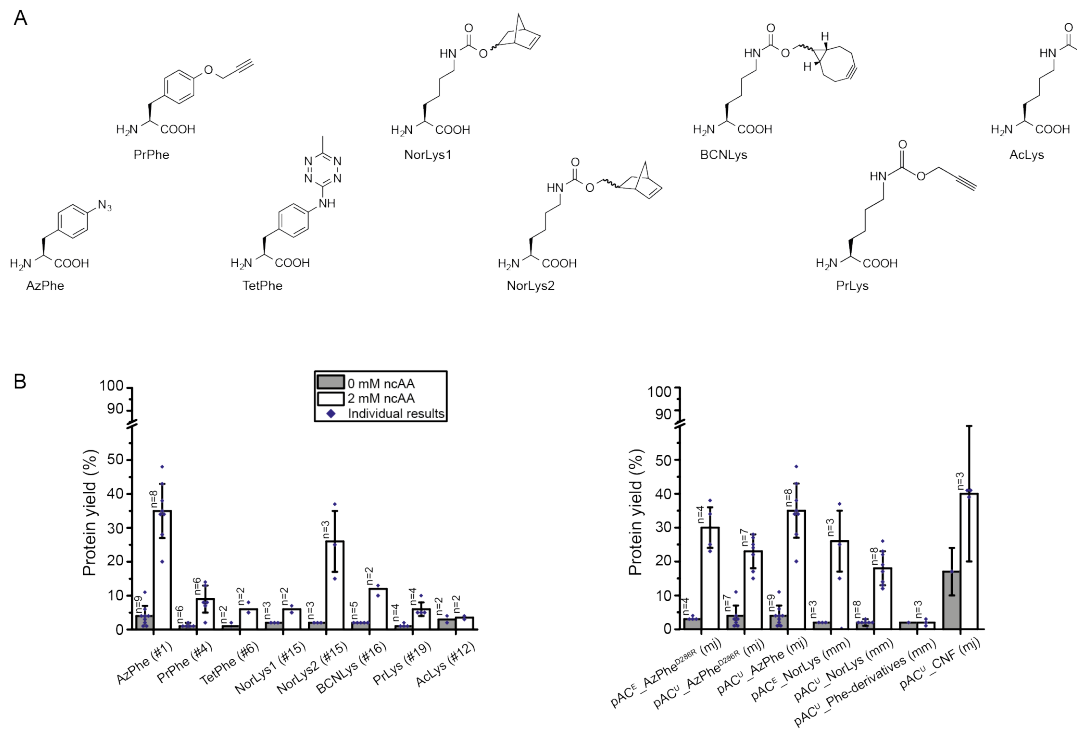

714

715 **Figure 2: Amber codon suppression at site Leu54 in the ACP-GFP fusion construct**  
 716 **screened in reporter assay.** A) Overview of ncAAs used in this study. B) Best expression  
 717 efficiency of different ncAAs (left panel) and comparison of some representatives of the  
 718 screening (right panel). Respective plasmids used for incorporation of ncAAs are indicated by  
 719 plasmid number (#; listed in Supplementary Table S2). A compilation of all results from the  
 720 reporter assay can be found in Supplementary Fig. S2. Expression efficiency is read out by  
 721 GFP fluorescence of 2 mL *E. coli* cell cultures and compared to wild type reference (taken as  
 722 100%). For incorporation, 2 mM ncAAs were supplemented to the medium. Cultures lacking  
 723 ncAAs were taken as negative control to determine background signal. Dots refer to values of  
 724 the biological samples. The averages of biological samples are plotted together with standard  
 725 deviations. Technical errors were below 10%.

726

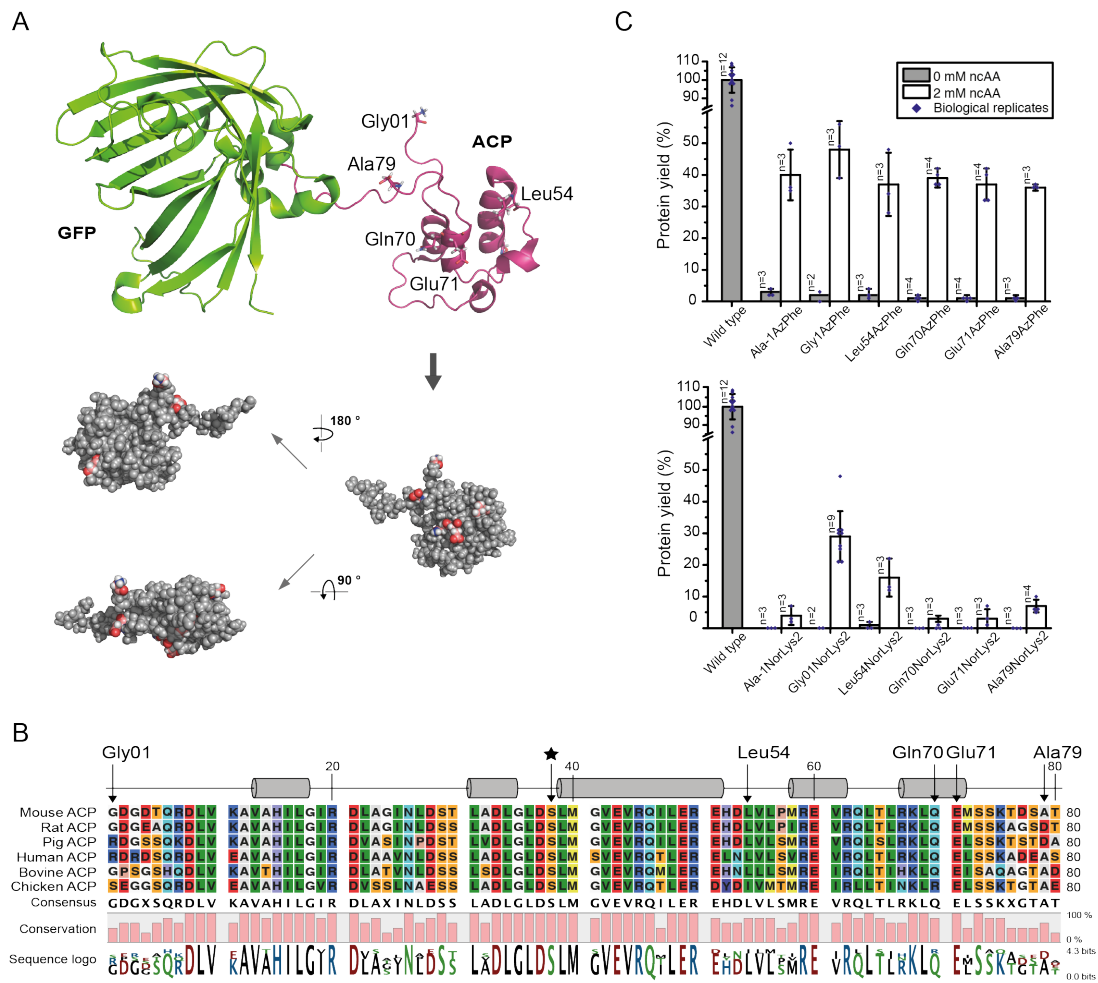

727

728 **Figure 3: Screening of amber codon mutation sites.** A) Cartoon representation of the  
 729 ACP-GFP fusion construct (upper panel; pink: rat ACP (PDB: 2png) and green: eGFP (PDB:  
 730 2y0g)) used in the reporter assay. The five amber mutation sites are labelled and depicted in  
 731 stick representation (Gly01, Leu54, Gln70, Glu71 and Ala79). Different orientations of the  
 732 ACP domain (shown in a sphere-filling model) demonstrate the positioning of all amber  
 733 mutation sites on the surface of the domain (lower panel). Amber mutation sites are coloured  
 734 in red. B) Sequence alignment of six different ACP domains of animal FASs. Uniprot  
 735 accession codes: mouse FAS: P19096; rat FAS: P12785; pig FAS: A5YV76; human FAS:  
 736 P49327; bovine FAS: Q71SP7 and chicken FAS: P12276. The five amber mutation sites are  
 737 highlighted by arrows, and a star highlights the active serine residue. Secondary structure  
 738 elements received from the rat ACP model (PDB: 2png) are depicted ( $\alpha$ -helices shown as  
 739 cylinders). C) Expression efficiencies of six different AzPhe mutants (upper panel) and six  
 740 different NorLys2 mutants (lower panel) in comparison to the wild type reference, read out by  
 741 the GFP fluorescence of 2 mL cultures of *E. coli* cells. For incorporation, 2 mM ncAAs were  
 742 supplemented to the medium. Cultures lacking ncAAs were taken as negative control to  
 743 determine background signal. The averages of biological replicates are plotted together with  
 744 standard deviations and the distribution of individual values is indicated as dots. Technical  
 745 errors were below 10%.

746

747 **Fig**

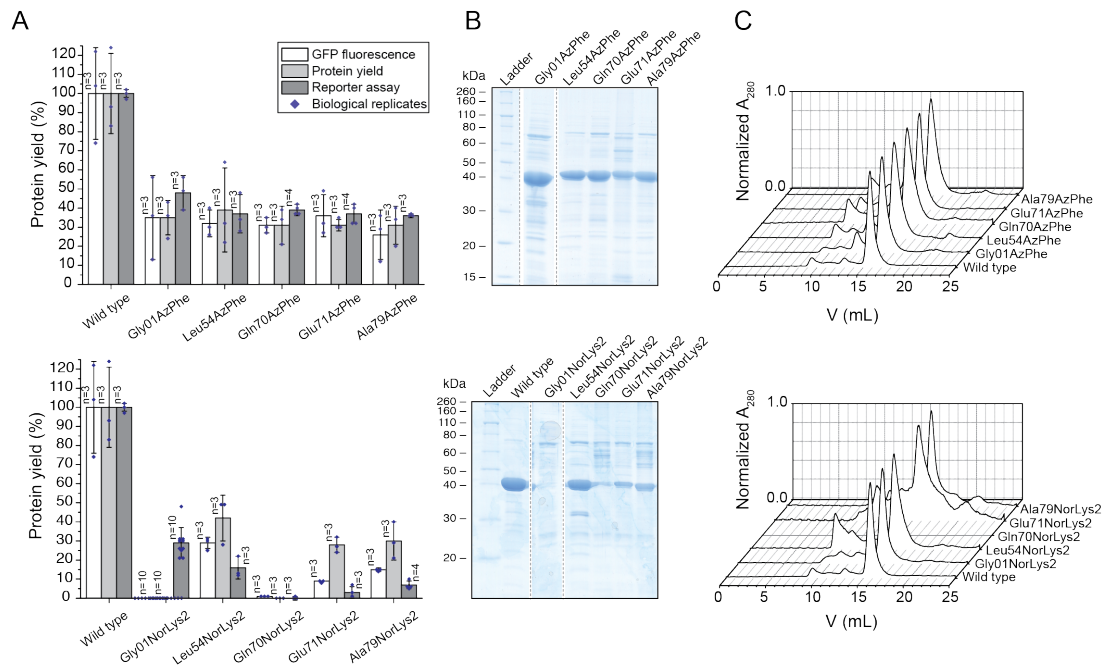

748

749 **re 4: Large scale expression and purification of ACP-GFP mutants (upper panels**

750 **AzPhe mutants, lower panels NorLys2 mutants).** A) Comparison of the results from large

751 scale expression cultures (protein yield was read out by GFP fluorescence of a 2 mL sample

752 and by the yield of purified protein) with previous results from the reporter assay. Data

753 compare expression efficiency of wild type and five different AzPhe mutants (upper panel),

754 and expression efficiency of wild type and five different NorLys2 mutants (lower panel). All

755 expression efficiencies are related to the wild type reference. For incorporation, 2 mM ncAA

756 were supplemented to the medium. The averages of biological replicates are plotted together

757 with standard deviations and the distribution of individual values is indicated as dots.

758 Technical errors were below 10%. B) SDS-PAGE (NuPAGE Bis-Tris 4-12%) gel of ACP-GFP

759 mutants purified by Ni-chelating chromatography. Lanes have been assembled for clarity, but

760 scans of the original gels can be found in Supplementary Fig. S6. SDS-PAGE shows one set

761 of purified proteins (one biological replicate). C) Preparative SEC of ACP-GFP mutants

762 performed with a Superdex 200 Increase 10/300 GL column (the set of proteins shown in B).

763 Peaks at an elution volume of 16 mL correspond to the ACP-GFP variants. The void volume

764 of the column is at ca. 9 mL.

765

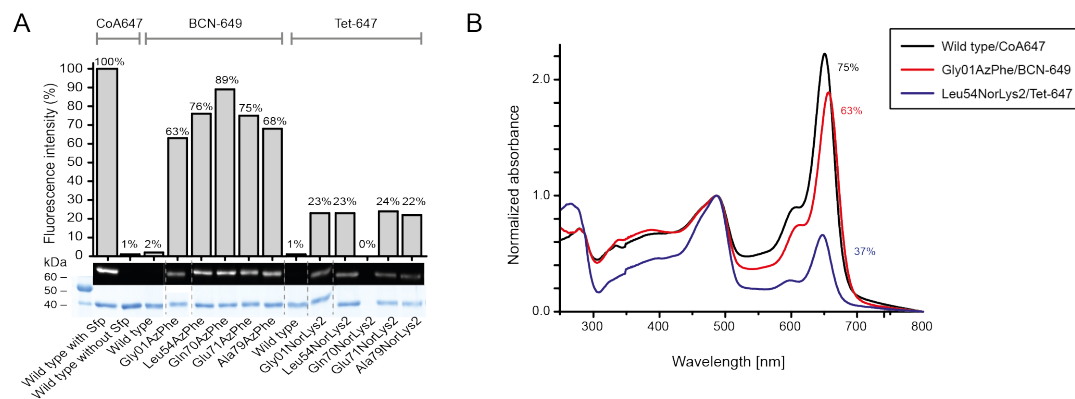

766

767 **Figure 5: Fluorescent labelling of ACP-GFP mutants.** A) DOL of ACP-GFP mutants in  
 768 respect to the amber mutation site determined by relative in-gel fluorescence intensities at  
 769 wavelength 650 nm. The ACP-GFP construct was enzymatically modified by a fluorescent  
 770 CoA647-label with Sfp and served as the wild type reference. Hence, it was put to 100%  
 771 fluorescence intensity. AzPhe mutants were labelled with 80 equiv. of BCN-POE<sub>3</sub>-NH-  
 772 DY649P1 (BCN-649), NorLys2 mutants were labelled with 80 equiv. of 6-methyl-tetrazine-  
 773 ATTO-647N (Tet-647) in 10  $\mu$ L reaction volume. All fluorescence intensities were corrected  
 774 by the quantum efficiency of the respective fluorophore and correlated to the protein bands of  
 775 the Coomassie-stained gel (lanes have been assembled for clarity). Scans of the original gels  
 776 are presented in Supplementary Fig. S7. B) DOL determined by UV-Vis spectroscopy.  
 777 25 equiv. of fluorophore were used in labelling reactions of ACP-GFP mutants in 50  $\mu$ L  
 778 reaction volume. Free fluorophore was removed by purification over Ni-NTA magnetic beads.  
 779 UV-Vis absorbance spectra were normalized to GFP absorbance at wavelength 485 nm. DOL  
 780 is read out by comparing absorbance of the fluorophore at 650 nm to absorbance of GFP at  
 781 485 nm.

782

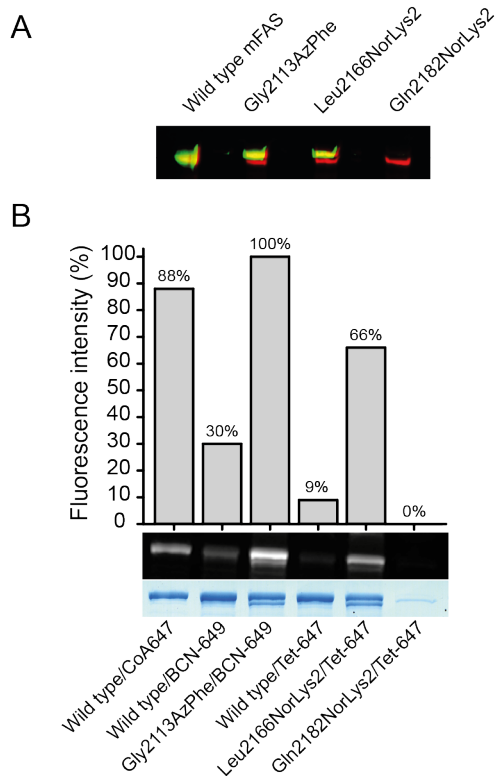

783

784 **Figure 6: Production of ncAA-modified mFAS mutants for fluorescent labelling.** A)

785 Quantitative western blot of mFAS mutants. The red channel refers to antibodies conjugated

786 with DyLight 755 against the N-terminal Strep-tag and the green channel to antibodies

787 conjugated with DyLight 633 against the C-terminal His-tag, respectively. The missing green

788 band in lane 4 indicates that expression of full-length Gln2182NorLys2 mFAS failed and that

789 only a truncated construct without the C-terminal part was obtained. B) Fluorescent labelling

790 of mFAS mutants. AzPhe mutants were labelled with BCN-POE<sub>3</sub>-NH-DY649P1 (BCN-649),

791 NorLys2 mutants were labelled with 6-methyl-tetrazine-ATTO-647N (Tet-647) and the wild

792 type mFAS was enzymatically modified at the ACP domain by a fluorescent CoA647-label by

793 Sfp. DOL is determined by the relative in-gel fluorescence intensities at wavelength 650 nm

794 related to the wild type reference. All fluorescence intensities were corrected by quantum

795 efficiency of the respective fluorophore and correlated to the protein bands of the Coomassie-

796 stained gel.

797

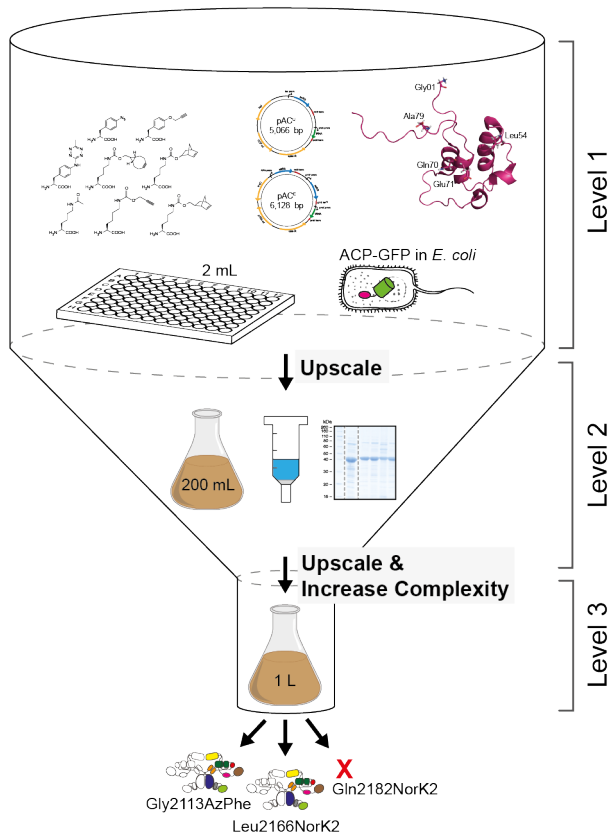

798

799 **Figure 7: Overview of the workflow of this study.** Workflow of amber codon suppression  
800 on mFAS divided into three different levels of project progress. Level 1 refers to the low-  
801 complex single-domain screening approach in 2 mL small scale cell cultures in 96-well plate  
802 format. GFP fluorescence is directly read out and serves as a measure for the efficiency of  
803 amber codon suppression. Level 2 refers to the upscaling of culture volumes to 200 mL using  
804 initial results from the reporter assay, which also allows obtaining purified protein for further  
805 analysis. In a final step, level 3 refers to the application of selected conditions and label  
806 positions, that were identified for an individual domain, for the full-length mFAS, being a  
807 representative for any comparable multidomain protein.

808
